1 CRISPR-Cas9 modified bacteriophage for treatment of *Staphylococcus aureus* induced  
2 osteomyelitis and soft tissue infection  
3  
4

5 Leah K. Horstemeyer,<sup>1</sup> JooYoun Park,<sup>2</sup> Elizabeth Swanson,<sup>3</sup> Mary C. Beard,<sup>1</sup> Emily M.  
6 McCabe,<sup>1</sup> Anna Rourke,<sup>1</sup> Keun Seok Seo,<sup>2</sup> Lauren B. Priddy<sup>1\*</sup>  
7  
8  
9

10 <sup>1</sup>Department of Agricultural and Biological Engineering, Mississippi State University,  
11 Mississippi State, MS, USA  
12

13 <sup>2</sup>Department of Basic Sciences, College of Veterinary Medicine, Mississippi State University,  
14 Mississippi State, MS, USA  
15

16 <sup>3</sup>Department of Clinical Sciences, College of Veterinary Medicine, Mississippi State University,  
17 Mississippi State, MS, USA  
18  
19

20 \*corresponding author  
21

22 Email: lbpriddy@abe.msstate.edu, (662) 325-5988, Department of Agricultural and Biological  
23 Engineering, Mississippi State University, 130 Creelman Street, Mississippi State, MS, USA  
24 39762  
25  
26

27 Authors' contributions: LKH contributed to study design, data collection, and manuscript  
28 writing. JYP contributed to study design, bacteriophage synthesis, and manuscript writing. ES  
29 contributed to study design and animal modeling. MCB contributed to sample processing,  
30 microscopy, and radiological analyses. EMM contributed to sample processing and radiological  
31 analyses. AR contributed to sample processing and microscopy. KSS contributed to study  
32 design, bacteriophage synthesis, and manuscript writing. LBP contributed to study design,  
33 statistical analysis, and manuscript writing. All authors have read and approved the final version  
34 of the manuscript.  
35

## 36 **Abstract**

37 Osteomyelitis, or bone infection, is often induced by antibiotic resistant *Staphylococcus aureus*  
38 strains of bacteria. Although debridement and long-term administration of antibiotics are the  
39 gold standard for osteomyelitis treatment, the increase in prevalence of antibiotic resistant  
40 bacterial strains limits the ability of clinicians to effectively treat infection. Bacteriophages  
41 (phages), viruses that effectively lyse bacteria, have gained recent attention for their high  
42 specificity, non-toxicity, and the low likelihood of resistance development by pathogens.  
43 Previously, we have shown that CRISPR-Cas9 genomic editing techniques could be utilized to  
44 expand bacteriophage host range and enhance bactericidal activity through modification of the  
45 tail fiber protein, as well as improve safety with removal of major virulence genes. In a dermal  
46 infection study, these CRISPR-Cas9 phages reduced bacterial load relative to unmodified phage.  
47 Thus, we hypothesized this bacteriophage would be effective to mitigate infection from a biofilm  
48 forming *S. aureus* strain *in vitro* and *in vivo*. *In vitro*, qualitative fluorescent  
49 imaging demonstrated superiority of phage to conventional vancomycin and fosfomycin  
50 antibiotics against *S. aureus* biofilm. Quantitative antibiofilm effects increased over time for  
51 fosfomycin, phage, and fosfomycin-phage (dual) therapeutics delivered via alginate hydrogel.  
52 We developed an *in vivo* rat model of osteomyelitis and soft tissue infection that was  
53 reproducible and challenging and enabled longitudinal monitoring of infection progression.  
54 Using this model, phage (with and without fosfomycin) delivered via alginate hydrogel were  
55 successful in reducing soft tissue infection but not bone infection, based on bacteriological,  
56 histological, and scanning electron microscopy analyses. Notably, the efficacy of phage at  
57 mitigating soft tissue infection was equal to that of high dose fosfomycin. Future research may

58 utilize this model as a platform for evaluation of therapeutic type and dose, and alternate delivery  
59 vehicles for osteomyelitis mitigation.

## 60 **Introduction**

61 For nearly a century, antibiotics have been a vital resource utilized by clinicians to  
62 eliminate infection, with nearly 270 million prescriptions dispensed in 2015 alone.[1] Antibiotics  
63 are utilized for a variety of infections, from common otitis externa (“swimmers ear”) to severe  
64 endocarditis, pneumonia, meningitis or osteomyelitis. Although antibiotics are typically able to  
65 clear infection, antibiotic resistant strains of bacteria continue to emerge. It is not as lucrative,  
66 nor as feasible, for pharmaceutical companies to develop novel antibiotics at the rates that these  
67 multi-drug resistant (MDR) bacterial strains are isolated. Nationally, approximately \$2.2 billion  
68 is spent annually to treat MDR bacterial infections.[2] By 2050, it is estimated that nearly 10  
69 million people could die each year due to resistant strains of bacteria.[3]

70 *Staphylococcus aureus* (*S. aureus*), a gram-positive bacterial strain, is one of the most  
71 commonly isolated and arguably one of the most detrimental pathogens with antibiotic  
72 resistance. One of the most common antibiotic resistant strains of *S. aureus* is methicillin-  
73 resistant *S. aureus* (MRSA). MRSA alone was responsible for over 80,000 reported infections in  
74 2011 alone, of which 11,285 resulted in death.[4] *S. aureus* is able to achieve antibiotic  
75 resistance with genomic changes such as altered synthesis of peptidoglycan, a major component  
76 of the bacterial cell wall. Additionally, some strains of *S. aureus* can produce biofilms, an  
77 extracellular polymeric matrix including dead bacterial cells, which surrounds and protects the  
78 living, underlying layer of *S. aureus*. [5] These biofilms can be difficult to penetrate, and  
79 oftentimes require surgical intervention to remove.

80 Difficulties in treating osteomyelitis, or the infection of bone, have been exacerbated by  
81 the rise of antibiotic resistant bacterial strains, particularly *S. aureus* strains, which are the most  
82 common cause of bone infection.[6] Of diabetic foot ulcers, which occur in 25% of diabetic  
83 patients, approximately 20% will spread to nearby bony hosts and result in osteomyelitis.[7] As  
84 diabetic diagnoses continue to increase in the United States with an expected 55 million to be  
85 afflicted by 2030, osteomyelitis infections will be an ongoing challenge for the healthcare  
86 community.[8] It is essential that new therapeutics be engineered and tested, for rapid translation  
87 into clinical use.

88 Bacteriophages (phages), or viruses that kill their bacterial hosts, are one class of  
89 therapeutics that have gained attention in recent years due to their high specificity, non-toxicity,  
90 and abundancy in nature.[9,10] Phages have been used for decades in Eastern Europe but have  
91 not yet been adopted in the United States or other countries. This may be due to public concern  
92 regarding elective viral use, issues concerning commercial phage production, and/or the ability to  
93 fund and validate clinical trials.[11] Nonetheless, the potential benefits of this treatment have  
94 been indicated by results of clinical trials of phages for treating diabetic foot ulcers, chronic  
95 otitis, and urinary tract infections[11–13]. In April 2019, data from clinical trials were published  
96 from Sydney, Australia, where intravenous (IV) administration of phage was utilized for  
97 *Staphylococcus* infection treatment. Marked reduction of *staphylococci* with no adverse events  
98 were reported.[14] In the United States as of January 2019, IV administration of phage for  
99 ventricular assist device infection treatment received approval for phase I/II clinical trials.[15]  
100 Collectively, these clinical trials demonstrate the efficacy of bacteriophage therapeutics and  
101 suggest their potential utility against MDR bacterial strains.

102 Hydrogels are a commonly used, easily tailored delivery vehicle for therapeutics for a  
103 wide variety of ailments, including osteomyelitis[6,16,17]. Alginate hydrogels are injectable,  
104 well characterized, and biocompatible.[18,19] Furthermore, bacteriophages have been  
105 successfully delivered to sites of infection with various hydrogel-based delivery systems in  
106 previous studies.[16,17,20]

107 Although the high specificity of phages can be beneficial for treating a known, single  
108 species, specificity of these viruses can make polymicrobial infection mitigation challenging. In  
109 the clinical scenario, it is ideal for health care providers to administer one broad-spectrum drug  
110 immediately upon patient presentation, rather than spend time identifying the causative agents of  
111 infection. Previously, we have utilized CRISPR-Cas9 to modify temperate bacteriophage, which  
112 effectively removed major virulence genes and expanded host range via modifications to the tail  
113 fiber protein (which codes host specificity). *In vitro* testing revealed the improvements of  
114 bacteriophage bactericidal activity due to this CRISPR-Cas9 system.[21] Within 6h of treatment,  
115 the CRISPR-Cas9 phage effectively killed  $1 \times 10^5$  CFU *S. aureus* culture. With native,  
116 unmodified phage treatment, the culture was found to increase to approximately  $1 \times 10^9$  CFU.  
117 Similar effects were noted in an *in vivo* dermal infection study, where CRISPR-Cas9 phage  
118 treatment resulted in nearly complete mitigation of dermal infections ( $\sim 1$  log CFU/g tissue),  
119 while treatment with unmodified phage resulted in a significantly higher bacterial load ( $\sim 3.5$  log  
120 CFU/g tissue).[21]

121 The objectives of the present work were: (i) to develop a green fluorescent protein (GFP)  
122 integrated *S. aureus* strain (ATCC 6538-GFP), modify bacteriophage using CRISPR-Cas9, and  
123 evaluate the bactericidal efficacy of our CRISPR-Cas9 modified bacteriophage *in vitro*,  
124 compared to conventional antibiotics, and (ii) to develop an *in vivo* model of osteomyelitis and

125 soft tissue infection using this biofilm forming *S. aureus* strain, and use it to assess the  
126 antimicrobial effects of bacteriophage, antibiotic, and dual bacteriophage-antibiotic therapies via  
127 histological, radiographic, and bacteriological analyses. Our hypothesis was that CRISPR-Cas9  
128 modified bacteriophage would be effective against *S. aureus* infection *in vitro* and in the femur  
129 and contiguous soft tissue *in vivo*.

130

## 131 **Materials and Methods**

### 132 **Bacterial Strain(s) and Culture**

133 For a stable quantification of biofilm, *S. aureus* strain ATCC 6538 was genetically  
134 modified to contain chromosomally integrated green fluorescent protein (GFP), as previously  
135 described.[22] Briefly, *S. aureus* strain ATCC 6538 was transduced with a temperature sensitive  
136 plasmid pTH100 harboring the GFP gene by electroporation and cultured in a brain heart  
137 infusion (BHI) agar plate supplemented with chloramphenicol (BHI-CM) at 30°C, a plasmid  
138 replication permissive temperature. To promote the first homologous recombination and cure  
139 pTH100, a single colony grown in a BHI-CM plate was transferred to a fresh BHI-CM plate and  
140 cultured at 42°C, a plasmid replication non-permissive temperature. To promote the second  
141 homologous recombination, which removed the plasmid and resulted in a loss of  
142 chloramphenicol resistance but maintained the GFP phenotype, a single colony was inoculated  
143 into BHI broth and cultured at 37°C overnight. A serial dilution of culture was inoculated onto a  
144 BHI plate and incubated at 37°C overnight. A GFP positive single colony checked by ultraviolet  
145 lamp was randomly selected and streaked onto BHI and BHI-CM. A colony that was both GFP  
146 positive and sensitive to chloramphenicol, indicating the integration of the GFP gene into the  
147 chromosome and removal of plasmid, was selected for experiments (ATCC 6538-GFP).

## 148 **Preparation of Alginate Hydrogels**

149 All alginate gels were initially prepared at a 3% (w/v) concentration, for ultimate dilution  
150 to 2% after loading them with therapeutic. A 3% alginate mixture (w/v) was made with alginic  
151 acid powder (Sigma-Aldrich) and alpha Minimum Essential Medium ( $\alpha$ MEM, Gibco) then left  
152 overnight at room temperature. This solution was sterile filtered (0.2  $\mu$ m, Pall) and transferred  
153 into 1mL syringes. Therapeutics were then added directly to the alginate. The crosslinker,  
154 calcium sulfate (0.21g CaSO<sub>4</sub> / mL distilled H<sub>2</sub>O) was loaded into a separate 1mL syringe and  
155 was mixed vigorously with the alginate solution for approximately one minute. Hydrogels were  
156 kept at 4°C or on ice until use.

## 157 **Synthesis of CRISPR-Cas9 Modified Bacteriophages**

158 *S. aureus* strain RF122 harboring CRISPR-Cas9 modified bacteriophage was cultured in  
159 BHI broth to the mid-exponential phase (OD600 at 0.3).[21] To induce CRISPR-Cas9 modified  
160 bacteriophage, mitomycin C (1  $\mu$ g/mL, Sigma-Aldrich) was added to the culture and further  
161 incubated at 30°C with shaking at 80 RPM. A complete lysis of culture typically occurred within  
162 2-3 hours. The clear lysate was sterilized with syringe filters (0.22  $\mu$ m, Nalgene). The  
163 concentration of phage was calculated by determining the plaque-forming units using a soft agar  
164 (0.5%, w/v) overlaying method.[21]

## 165 **Kirby-Bauer Analyses**

166 To analyze the bactericidal activity of therapeutics, a Kirby-Bauer assay was performed  
167 as previously described, with slight modifications.[23] Stock solutions of fosfomycin (50  
168 mg/mL) and phage (~10MOI/mL) were prepared in phosphate buffered saline (PBS). Using  
169 these stock solutions, a total of 10 $\mu$ L of: (i) fosfomycin, (ii) phage, (iii) dual: fosfomycin (5 $\mu$ L)  
170 and phage (5  $\mu$ L), or (iv) PBS alone were directly applied to bacterial lawns, without the use of

171 disks as traditionally described. The applied solutions were allowed to set undisturbed for  
172 approximately 5-10 minutes at room temperature, and were then incubated at 37°C for 24h. The  
173 zones of inhibition were then measured and recorded.

## 174 **Qualitative and Quantitative Bactericidal Activity on Biofilms**

175 For qualitative *in vitro* evaluation of antibiofilm efficacy, a 6-well tissue culture plate was  
176 pre-coated with 2% human serum for 24 hours, after which *Staphylococcus aureus* ATCC 6538-  
177 GFP was cultured in tryptic soy broth (TSB) supplemented with 2% glucose for 72 hours. After  
178 gentle washing with PBS, TSB supplemented with vancomycin (256, 512, or 1024 µg/mL),  
179 fosfomycin (16, 64, 128 µg/mL) or bacteriophage (5, 10, or 25 multiplicity of infection (MOI))  
180 was added to the biofilm and incubated for 24 hours. After gentle washing with PBS three times,  
181 remaining biofilm indicated by GFP signal was measured using Cytation 5 plate reader (BioTek).

182 To quantify the antibiofilm activity of selected therapeutics delivered by alginate  
183 hydrogels, fosfomycin, phage, or dual therapeutic was loaded in 2% alginate hydrogel and  
184 overlaid on top of the biofilms. As a control, empty 2% alginate hydrogel was used. BHI broth  
185 was added and cultures were incubated at 37°C for 24 h. After removing BHI broth, the entire  
186 2% alginate hydrogel and biofilm were harvested and vigorously washed with PBS by  
187 centrifugation to remove residual therapeutic. A serial dilution in PBS was plated onto BHI  
188 plates to determine viable bacterial counts.

## 189 **Rat Osteomyelitis Model**

190 All procedures (Fig. 1) were performed in accordance with the Institutional Animal Care  
191 and Use Committee (IACUC) of Mississippi State University. Charles River Sprague Dawley  
192 female rats, 13 weeks old, were housed with 12h light/dark cycles and were provided food and  
193 water *ad libitum*. Rats were administered slow release buprenorphine (1.0-1.2 mg/kg BW,



194 ZooPharm) pre-operatively for pain relief. Rats were anesthetized with isoflurane at an initial  
195 concentration of 2-3%, and maintained at 1-2%. After sterile preparation of the left hindlimb by  
196 fur removal and alcohol and chlorhexidine scrubs, the skin was incised with an anterior  
197 approach, from the level of mid-diaphysis to the patella, along the lower half of the femur. The  
198 muscle tissue was separated using blunt dissection along the muscle bundle divisions on the  
199 anterolateral side of the femur. In the mid-diaphysis, a 1.2 mm (diameter) bicortical defect was  
200 created with a pneumatic drill (Conmed Hall), and a #65 drill bit (McMaster-Carr). To mimic  
201 contamination of orthopedic screws with *S. aureus* occurring in development of osteomyelitis *in*  
202 *vivo*, sterile orthopedic screws (Antrin Miniature Specialties, #00-90) were placed into 200  $\mu$ L of  
203 a bacterial suspension ( $\sim 1 \times 10^8$  CFU) of ATCC 6538-GFP for approximately 5-10 minutes  
204 (average 6.5 min). The screw was then placed into a 96-well plate to dry for up to 6 minutes  
205 (average 4 min). The bacterial load of these contaminated screws was approximately  $5 \times 10^4$  CFU,  
206 determined by placing screws into 1mL of PBS, vigorously vortexing to elute bacteria from the  
207 screw, then serially diluting the eluents for bacterial counting on BHI agar plates. *In vitro*  
208 characterization of bacterial load based on (i) the time screws remained in culture (soak time)  
209 and (ii) dry time was performed using the same procedure as for bacterial counts from *ex vivo*  
210 screws. To assess the effect of soak time, dry time was kept at a constant 5 minutes, and  
211 similarly for the effect of dry time, soak time was kept constant at 5 minutes. To complete the *in*  
212 *vivo* procedure, the superficial fascia lata and skin were closed with sutures. Longitudinal  
213 monitoring of infection at days 1, 3, and 6 post-infection was performed via radiographs with  
214 fluorescent overlays using the IVIS Lumina XRMS II system (PerkinElmer).

215         After a 7 day infection period, the area was accessed along the original incision line. The  
216 infected screw was removed and placed into 1mL PBS or fixative for bacterial counting or SEM,

217 respectively. Then, 100  $\mu$ L of fosfomycin (3 mg), phage (MOI 3), dual (3 mg fosfomycin and  
218 MOI 3 phage), or PBS loaded into 2% alginate hydrogel was injected into the lateral end of the  
219 bicortical defect, with excess hydrogel pooling in the medial, underlying soft tissue.

220 On day 8, approximately 24 hours post-treatment, animals were sacrificed via CO<sub>2</sub>  
221 inhalation. The hindlimb was initially cleaned with chlorhexidine, and sterile instruments were  
222 used to disarticulate the femur and adjacent soft tissues for further evaluation. For bacterial  
223 counting, bone samples were initially minced using sterile bone rongeurs and further processed  
224 using a homogenizer (Cole-Parmer, LabGEN7, 30s at setting 2-3, 30s at setting 9-10). Soft tissue  
225 samples were minced using sterile surgical scissors, then homogenized (30s at setting 2-3, 30s at  
226 setting 7-8). Following initial processing, homogenates were vortexed (2000 RPM, 1 minute),  
227 diluted as necessary, spread onto BHI agar plates, and incubated for 24 hours at 37°C for  
228 enumeration, with a detection limit set at 25-250 colonies.

229 **Fig 1. Overview of *in vivo* experimental procedure.** (A-B) On day 0 (infection surgery day), a  
230 bicortical defect (drill hole) was generated in the mid-diaphysis of the left femur. A  
231 contaminated orthopedic screw was then fastened into this space, and left for 7 days to generate  
232 robust osteomyelitis and soft tissue infection. At day 7, the orthopedic screw was removed and  
233 100 $\mu$ L of therapeutic(s) were injected into the defect space. At day 8, 24h after treatment, soft  
234 tissues and bone samples were collected for histology, scanning electron microscopy, and  
235 bacterial counts. (C) At days 1, 3, and 6, IVIS imaging was performed to track infection  
236 progression.

### 237 **Electron Microscopy and Histological Analyses**

238 Screw samples for electron microscopy analysis were collected during revision surgeries  
239 on day 7 immediately prior to application of treatment, and placed directly into a fixative

240 consisting of 5% glutaraldehyde, 2% paraformaldehyde (w/w) in a sodium cacodylate buffer (a  
241 modified “Karnovsky’s” solution).[24] For electron microscopy analysis of infected bone, a  
242 representative control femur (empty alginate group) was collected at day 8, broken along the  
243 screw line with sterile bone rongeurs, and immediately placed in fixative for 24h. For both the  
244 screw and bone samples, no dehydration series was performed in order to preserve the biofilm.  
245 Prior to imaging, both samples were placed onto stubs with carbon tape and sputter coated  
246 (Quorum Tech Model # SC7640) with platinum at 30 mA and 3.5 kV for 3-5 minutes. All  
247 samples were then imaged using FESEM (Carl Zeiss AG-SUPRA 40).

248 For histological analyses, the infected femur and adjacent soft tissues were placed into  
249 10% formalin for 48h, at ~20°C. Bone samples were decalcified for 5 days in Kristensen’s  
250 solution, then rinsed and placed into 10% formalin.[25] Tissues were routinely processed,  
251 embedded in paraffin, sectioned at 5µm, and Gram or hematoxylin and eosin (H&E) stained.

## 252 **Statistical Analyses**

253 All statistical analyses were performed using either GraphPad Prism 8 or SAS software  
254 systems. For the Kirby-Bauer assay, a one-way analysis of variance (ANOVA) with Tukey’s  
255 multiple comparisons test was performed. For the *in vitro* antibiofilm assay, a two-way ANOVA  
256 with Tukey’s multiple comparisons were performed. For bacterial counts from directly prepared  
257 and *ex vivo* orthopedic screws, a one-way ANOVA was performed, with Sidak’s multiple  
258 comparisons. All aforementioned statistical analyses were performed using GraphPad Prism 8  
259 (GraphPad Software, Inc.). For bone and soft tissue *ex vivo* bacterial counts, general linear  
260 models using PROC MIXED in SAS (SAS Institute, Inc.) were performed, with pairwise  
261 comparisons using Tukey’s (comparing treatment groups to one another) or Dunnett’s

262 (comparing each treatment to control) tests. An alpha level of 0.05 was used to determine  
263 statistical significance for all methods. Data are presented as mean  $\pm$  standard deviation (SD).

## 264 **Results**

### 265 **Integration of GFP into *S. aureus***

266 Longitudinal analyses of infection progression and regression is an ideal tool for new  
267 model generation. Plasmids harboring reporter genes such as luminescence and fluorescence  
268 have been most commonly used; however, it is necessary to constantly provide antibiotic  
269 selective pressure to prevent a loss of plasmid, which is not achievable with *in vivo* models. In  
270 this study, we integrated the GFP reporter gene into the genome of *S. aureus* ATCC 6538 strain  
271 for the stable and accurate assessment of bacterial growth. All *S. aureus* ATCC 6538-GFP  
272 colonies grown in BHI plates without antibiotic selective pressure were highly fluorogenic over a  
273 span of 7 days (Fig. 2A). Furthermore, ATCC 6538-GFP recovered from an *ex vivo* orthopedic  
274 screw at day 7 post-infection was still highly fluorogenic (Fig. 2B). These results demonstrated  
275 that *S. aureus* ATCC 6538 chromosomally integrated with GFP can be used for real-time  
276 monitoring of bacterial proliferation *in vitro* and *in vivo*.

277 **Fig 2. Integration of GFP into ATCC 6538.** (A) Phenotypic expression confirming integration  
278 of GFP into ATCC 6538 was stable over a 7 day period. (B) A *Staphylococcus aureus* CFU  
279 isolated from a contaminated screw *ex vivo* at day 7 revealed GFP expression continued after  
280 growth over a week *in vivo*.

### 281 **Kirby-Bauer Analyses**

282 For initial investigation of selected therapeutics, a Kirby-Bauer assay was performed  
283 (Fig. 3A). All therapeutics—fosfomycin, phage, and dual—had a larger zone of inhibition than

284 the PBS control (“a”,  $p < 0.0001$ ), which generated no zone of inhibition (“N.D.”) Dual and  
285 fosfomycin also resulted in a zone of inhibition greater than phage treatment (“b,”  $p < 0.0001$ ).

286 **Fig 3. *in vitro* Analyses of Therapeutic Bactericidal Activity.** (A) From the Kirby-Bauer assay,  
287 all therapeutics delivered via PBS had a greater antibacterial effect than the PBS control (“a”,  
288  $p < 0.0001$ ), which generated no zone of inhibition (“N.D.”). Dual and fosfomycin therapeutics  
289 also generated a zone of inhibition greater than phage treatment (“b,”  $p < 0.0001$ ). (B)

290 Vancomycin (256-1024  $\mu\text{g/mL}$ ), fosfomycin, (16-128  $\mu\text{g/mL}$ ) and bacteriophage (MOI 5-25)  
291 delivered via PBS revealed varied bactericidal activity, where green indicated bacterial vitality  
292 and black indicated a lack of bacterial presence. Interestingly, vancomycin appeared to have little  
293 to no efficacy on biofilms at all concentrations. Fosfomycin, in contrast, showed efficacy at 64  
294 and 128  $\mu\text{g/mL}$ , a dose range approximately one-tenth the vancomycin doses utilized.

295 Bacteriophage was effective at an MOI of 10, indicated by the black panel revealing no viable *S.*  
296 *aureus*. (C) Compared to the empty alginate group, alginate-loaded fosfomycin, phage, and dual  
297 therapeutic-treated biofilms had lower bacterial loads at 6, 12, and 24 hours, except the  
298 fosfomycin group at 6 hours (“c,”  $p < 0.05$ ). Interestingly, all groups (fosfomycin, phage, dual,  
299 and empty alginate gel) had lower growth at all time points compared to the PBS control, i.e. the  
300 empty alginate gel exerted a killing effect (“s,”  $p < 0.05$ ). Within individual treatment groups over  
301 time, increased antimicrobial effects were observed. The fosfomycin treated biofilms were  
302 different at 6 and 12 hours, and at 12 and 24 hours (\*\* $p < 0.0001$ ). Phage treated groups were  
303 different at 6 and 12 hours, and at 6 and 24 hours (\* $p < 0.05$ ). Dual treated biofilms were different  
304 at 6 and 12 hours, at 6 and 24 hours, and at 12 and 24h (\*\* $p < 0.0001$ ). The empty alginate and  
305 PBS controls resulted in no changes over time.

306

## 307 **Qualitative and Quantitative Bactericidal Activity on Biofilms**

308 Biofilms are generally considered the greatest agent of osteomyelitis treatment failure,  
309 and thus are important to consider when developing therapeutics. For this reason, it is important  
310 to evaluate the efficacy of novel therapeutics on robust biofilms, for translation into relevant  
311 clinical scenarios. Antibiofilm efficacy of therapeutics *in vitro* was characterized utilizing two  
312 different analyses: (i) qualitative fluorescent (phenotypic) assessment and (ii) quantitative  
313 bacterial counting. Surprisingly, vancomycin, one of the most commonly utilized antibiotics for  
314 difficult osteomyelitis cases, appeared to have little or no effect on biofilms, as indicated by the  
315 presence of green fluorescing *S. aureus* (Fig. 3B). Fosfomycin is a small molecular weight (138  
316 g/mol) broad-spectrum antibiotic and promising therapeutic option against biofilm.[26] Here,  
317 fosfomycin appeared to remove biofilm at 64 and 128  $\mu\text{g/mL}$ , doses much lower than  
318 vancomycin. The CRISPR-Cas9 modified bacteriophage has dual killing mechanisms: (i) a direct  
319 lysis of target bacteria by holin or murein hydrolase, and (ii) CRISPR-Cas9 nuclease activity.  
320 From qualitative fluorescent analyses, it was determined than a phage MOI of  $\sim 10$  was effective  
321 in clearing biofilm infection (Fig. 3B).

322 Alginate is a versatile biopolymer used for prolonged, localized availability of  
323 therapeutic.[27] Antibiofilm assays with bacterial counts were utilized to qualitatively assess the  
324 effects over time of selected therapeutics delivered via alginate (Fig. 3C). Compared to the  
325 empty alginate group, fosfomycin, phage, and dual therapeutic-treated biofilms had significantly  
326 lower bacterial loads at 6, 12, and 24 hours, except the fosfomycin group at 6 hours (“c,”  
327  $p < 0.05$ ). Interestingly, all groups (fosfomycin, phage, dual, and empty alginate gel) were  
328 significantly lower at all time points compared to the PBS treatment, i.e. the empty alginate gel  
329 exerted a killing effect (“s”,  $p < 0.05$ ). In all treatment groups where alginate was loaded with

330 therapeutic(s), antibiofilm effects increased over time. The fosfomycin treated biofilms were  
331 different at 6 and 12 hours, and at 12 and 24 hours (\*\* $p < 0.0001$ ). Phage treated groups were  
332 different at 6 and 12 hours, and at 6 and 24 hours (\* $p < 0.05$ ). Dual treated biofilms were different  
333 at 6 and 12 hours, at 6 and 24 hours, and at 12 and 24h (\*\* $p < 0.0001$ ). As expected, the empty  
334 alginate and PBS controls did not change over time.

### 335 **Bacterial Load on Orthopedic Screws**

336 To generate consistent infection in the osteomyelitis model, contaminated orthopedic  
337 screw preparation had to first be characterized. Two parameters of screw preparation were  
338 evaluated: soak time and dry time. Soak time (5-20 min) of screws appeared to increase  
339 somewhat proportionally with respect to bacterial load (Fig. 4A). Dry times from 0-10 min  
340 appeared to have little effect on bacterial load; at 20 min, decreased viability of *S. aureus* was  
341 observed (Fig. 4B).

342 In the *in vivo* model, orthopedic screws removed at day 7 to allow injection of therapeutic  
343 into the infected defect space were analyzed for bacterial load to confirm all treatment groups  
344 began with a similar extent of infection. Bacterial counts from *ex vivo* screws indicated similarly  
345 severe infection among all samples (treated immediately following), with an average  $8.19 \times 10^4$   
346 CFU/mL bacterial load (Fig. 4C). Per what would become individual treatment groups,  
347 calculated averages were:  $1.05 \times 10^5$ ,  $7.50 \times 10^4$ ,  $8.20 \times 10^4$ , and  $6.57 \times 10^4$  for fosfomycin, phage,  
348 dual, and control groups, respectively. No significant differences between any groups were  
349 observed.

350 **Fig 4. Effect of soak time and dry time on bacterial load of orthopedic screws.** (A) Soak time  
351 of sterile orthopedic screws in *Staphylococcus aureus* appeared to linearly relate to ultimate  
352 bacterial load. (B) Dry time did not appear to decrease ultimate bacterial load, until 20 minutes

353 of dry time. (A-B) The ranges of soak time and dry time used for preparation of screws for the *in*  
354 *vivo* study are indicated by the red portions of the x-axes. The average time for soak and dry  
355 times for orthopedic screws used *in vivo* is marked by an “x”. (C) Bacterial counts collected  
356 from orthopedic screws at day 7 *ex vivo* indicated a similar ultimate bacterial load among what  
357 would become different treatment groups.

## 358 **Scanning Electron Microscopy**

359 Representative SEM images of screws collected at day 7 post-infection revealed an  
360 abundance of gram positive cocci (*S. aureus*), as expected, along the distal portion of the screw  
361 and within the ridges of the screw throughout its length (Fig. 5A-B). In bone fragments collected  
362 along the screw line (defect site) of an untreated (empty alginate) control sample at day 8 (24h  
363 post-treatment), gram positive cocci, presumably *S. aureus*, were visible. (Fig. 5C-D).

364 **Fig 5. Bacteria on *ex vivo* orthopedic screws and bone.** (A-B) Gram positive cocci, and what  
365 appears to be biofilm, was evident on the distal portion (A) and between threads (B) of an *ex vivo*  
366 orthopedic screw excised at day 7. (C-D). Femur sample adjacent to the defect/screw site  
367 collected at day 8 from untreated (empty alginate) control revealed dispersed gram positive  
368 cocci.

## 369 **Bacterial Load Within Bone and Soft Tissue**

370 The average bone bacterial counts per treatment group were as follows: (i) control:  $4.197$   
371  $\pm 0.289$ , (ii) fosfomycin:  $3.401 \pm 0.924$ , (iii) phage:  $4.076 \pm 0.268$ , and (iv) dual:  $3.607 \pm 0.316$   
372 ( $\text{Log}_{10}(\text{CFU})$ ), Fig. 6A). Fosfomycin bacterial counts were lower than empty alginate control  
373 ( $p=0.0083$ ) and phage ( $p=0.0486$ ).

374 The average soft tissue bacterial counts per treatment group were as follows: (i) control:  
375  $4.713 \pm 0.331$ , (ii) fosfomycin:  $4.146 \pm 0.377$ , (iii) phage:  $4.160 \pm 0.516$ , and (iv) dual:  $4.201 \pm$



376 0.556 ( $\text{Log}_{10}(\text{CFU})$ ), Fig. 6B). Bacterial counts were lower in fosfomycin ( $p=0.0225$ ), phage  
377 (0.0265), and dual ( $p=0.0430$ ) treated groups compared to empty alginate control.

378 **Fig 6. Bacterial counts from bone and soft tissue.** (A) Bacterial counts from bone tissue  
379 harvested from fosfomycin treated animals were lower than those for empty alginate  
380 (\*\* $p=0.0083$ ) and phage ( $*p=0.0486$ ) groups. (B) In soft tissue, bacterial loads were reduced in  
381 all three treatment groups—fosfomycin ( $*p=0.0225$ ), phage ( $*p=0.0265$ ), and dual  
382 ( $*p=0.0430$ )—compared to empty alginate.

### 383 **Histology**

384 Bone samples stained with H&E or Gram revealed strong evidence for development of a  
385 severe osteomyelitis infection. The areas at the site of the screw were characterized by extensive  
386 remodeling within the medullary cavity, with replacement of marrow cells by a central area of  
387 neutrophils surrounded by fibrovascular proliferation and reactive bone. Within the cortex, at the  
388 site of screw placement, was mild bone necrosis characterized by empty lacunae and bone loss.  
389 Along the periosteal surface there was locally extensive proliferation of woven bone (periosteal  
390 proliferation). Additionally, abundant gram-positive cocci were localized within the bone. No  
391 differences in the extent of infection among any groups were apparent. The outcome of the  
392 fosfomycin-treated bone histology varied from the other samples, due to sample damage during  
393 processing. Ultimately, this prevented the collection of images along the screw line (where the  
394 majority of bacteria and inflammation were localized), as seen with the other groups. However,  
395 the proliferation of woven bone, as a reactive process on the cortical surface, is visible (Fig. 7B).  
396 Within the phage-treated bone sample, a linear track of gram-positive bacteria in the bone at the  
397 original site of the screw line was visible (Fig. 7C). In the dual-treated sample, neutrophilic  
398 inflammation surrounded by reactive bone and fibrosis was observed (Fig. 7D left, \*).

399  
400 **Fig 7. Histology of infected bones one day post-treatment.** (A, left) At the site of the screw of  
401 the empty alginate control was marked neutrophilic inflammation (arrows) with bone loss,  
402 surrounded by reactive bone and fibrosis (\*, bar=50 $\mu$ m). (A, right) A higher magnification of the  
403 area of bone loss with large numbers of neutrophils (bar=5 $\mu$ m). Inset demonstrating gram  
404 positive bacteria within and outside macrophages (arrow, bar=5 $\mu$ m). (B) Within the fosfomycin  
405 treated bone, periosteal proliferation of woven bone was noted (arrows, bar=50 $\mu$ m). (C, left) A  
406 linear track in the bone at the site of the screw (arrows) with abundant neutrophils and reactive  
407 bone and fibrosis was observed (arrows, H&E, bar=5 $\mu$ m). (C, right) Gram staining  
408 demonstrating aggregates of basophilic bacteria along the screw site (bar=50 $\mu$ m). Inset is a  
409 higher magnification of the bacteria (bar=5 $\mu$ m). (D, left) At the site of the screw was marked  
410 neutrophilic inflammation with bone loss (arrows), surrounded by reactive bone and fibrosis (\*,  
411 bar=50 $\mu$ m). (D, right) A higher magnification of the area of bone loss with large numbers of  
412 neutrophils (bar=50 $\mu$ m). Inset demonstrating gram positive bacteria within and outside  
413 macrophages (arrow, bar=5 $\mu$ m).

## 414 **Discussion**

415 In this manuscript, a previously developed CRISPR-Cas9 modified bacteriophage  
416 therapeutic, which was successful in treating external dermal infection[21], was evaluated as a  
417 therapeutic for internal osteomyelitis and contiguous soft tissue infection in a rat model using a  
418 biofilm forming strain of *S. aureus*. For real time monitoring of *S. aureus*, GFP was  
419 chromosomally integrated into *S. aureus* ATCC 6538 strain by homologous recombination. We  
420 demonstrated that *S. aureus* ATCC 6538 strain carrying the GFP gene stably maintained the GFP  
421 phenotype without antibiotic selective pressure *in vitro* and *in vivo*.

422           The therapeutic effects of vancomycin, fosfomycin, CRISPR-Cas9 modified  
423 bacteriophage, and fosfomycin-bacteriophage dual treatments were evaluated against biofilm *in*  
424 *vitro*. Vancomycin is considered a last resort treatment for *S. aureus* infection. Recent guidelines  
425 recommend vancomycin trough concentrations between 15 and 20 µg/mL for effectively  
426 controlling *S. aureus* infection.[28] As biofilms are typically more difficult to treat than  
427 planktonic bacteria, a much higher concentration of vancomycin (256-1024 µg/mL) was used  
428 here. Although the planktonic *S. aureus* ATCC 6538 strain was sensitive to vancomycin at 2  
429 µg/mL within BHI broth (data not shown), in biofilm form, it was highly resistant to vancomycin  
430 even at 1024 µg/mL. Biofilms consist of a group of bacteria and their byproducts such as  
431 extracellular polymeric substances (EPS) including proteins, DNA, RNA, polysaccharides, and  
432 peptidoglycans. These EPS materials provide physical barriers to penetration of antibiotics to the  
433 inner viable population of bacteria in the biofilm. Vancomycin, a large glycopeptide antibiotic  
434 with a molecular weight of 1,449 g/mol, binds to the D-ala-D-ala terminal amino acid at the stem  
435 of pentapeptide crosslinking peptidoglycan for efficacy[29]. Thus, resistance to vancomycin by  
436 biofilm may be explained by poor penetration of vancomycin due to its bulky size, which could  
437 have led to entrapment at the peptidoglycan layer of biofilm. In contrast, fosfomycin showed  
438 better efficacy against biofilm at much lower (64 and 128 µg/mL) doses. Fosfomycin is a small  
439 bactericidal antibiotic with a molecular weight of 138 g/mol. It interferes with the first step of  
440 peptidoglycan synthesis by inhibiting the phosphoenolpyruvate synthetase[30]. Thus, the  
441 enhanced fosfomycin efficacy could be explained by better penetration of fosfomycin due to its  
442 small size and its inhibition of the first step of peptidoglycan synthesis. From qualitative  
443 fluorescent analyses, it was determined that a phage MOI of ~10 was effective in clearing  
444 biofilm infection. This is similar and in some cases an improvement upon *in vitro* evaluation of

445 phage treatments discussed in literature, with biofilm eradication reported with MOI 10-  
446 100.[21,31,32] Alginate hydrogel served as an effective delivery vehicle, enabling increasing  
447 effects against biofilm over a 24h period, for fosfomycin, phage, and dual treatments *in vitro*.  
448 Previously, we have observed similar sustained effects of bone morphogenetic protein-2 released  
449 from and retained within alginate hydrogels *in vitro* and *in vivo*. [18,27]

450 For further evaluation of the CRISPR-Cas9 phage, motivated by augmented *in vitro*  
451 efficacy relative to antibiotic controls, we developed a clinically relevant model of implant-  
452 related osteomyelitis. In human cases of osteomyelitis, chronic infection is diagnosed after a 6-  
453 week period of infection, while our model had only a 1-week infection period. Based on SEM  
454 images, 1 week appeared to be sufficient to induce severe infection, including biofilm, in this rat  
455 model. By culturing *S. aureus* on orthopedic screws, infection was localized to the femur and  
456 surrounding soft tissue, as indicated by fluorescent imaging and histology. Fluorescent imaging  
457 served as a qualitative tool for longitudinal infection progression/regression, although no direct  
458 correlation between radiance output and bacterial load were observed (data not shown). This  
459 could be attributed at least in part to a residual GFP signal that likely exists after bacterial cell  
460 death, due to the persistence of the GFP. Clinically, debridement accompanied by long-term  
461 antibiotic administration is the gold standard for osteomyelitis treatment.[33] In this study, we  
462 have avoided debridement altogether so as to limit potential clearing of infection from any  
463 source other than the therapeutics delivered. For future studies, debridement may be included to  
464 more readily mimic the clinical scenario and enable evaluation of larger antibacterial materials  
465 such as scaffolds or putties.

466 From bacterial counts performed on excised soft tissues, it was determined that severe  
467 soft tissue infection accompanied the expected high bacterial load in the bone samples. In

468 clinical cases of osteomyelitis, soft tissue infection is a common pathological finding of  
469 osteomyelitis infection progression[34–36]. In this model, soft tissue infection likely developed  
470 due to the distal end of the orthopedic screw resting freely within the soft tissue medial to the  
471 defect site. On excised orthopedic screws collected on day 7, scanning electron microscopy  
472 indicated a purulent, thick biofilm layer of *Staphylococci* on the end of the orthopedic screw.  
473 Based on *in vitro* results, the process of orthopedic screw preparation can be used to tailor the  
474 extent of infection, as soaking the screws for a shorter period of time would be expected to  
475 introduce less *S. aureus* into the bone and as a result induce a less severe infection. Histology  
476 results support the development of severe osteomyelitis infection, with disease hallmarks such as  
477 neutrophilic inflammation, reactive bone, fibrosis, and gram-positive bacteria. Within the 24-  
478 hour time frame of this study, no differences among treatment groups were apparent. If later time  
479 points were evaluated, the differences noted in bacterial counting would likely be more readily  
480 reflected histologically.

481         Although only the fosfomycin group resulted in reduced bacterial load in the femur, in  
482 soft tissue, all three treatments, including phage alone and phage with fosfomycin (dual) led to  
483 lower bacterial counts compared to empty alginate. It should be noted than an extremely high  
484 dose of fosfomycin (3g) was administered to the rat femur in this study. In humans, a 3g oral  
485 dose is recommended for treatment of urinary tract infections.[26] Conversely for bacteriophage  
486 dose, although a minimum effective MOI of ~10 was observed *in vitro*, *in vivo* only MOI of ~3  
487 was able to be delivered due to: (i) the volume of alginate hydrogel delivered to the small defect  
488 site (100  $\mu$ L total, but only ~10  $\mu$ L fit into the defect itself), and (ii) the thicker consistency of  
489 phage solution, limiting the concentration that could be prepared in alginate hydrogel.  
490 Collectively, these discrepancies in dosing likely limited the efficacy of phage treatment alone in

491 osteomyelitis mitigation relative to antibiotic with and without phage. Furthermore, the  
492 canaliculi of cortical bone may provide an ideal environment for bacteria to evade treatment.[37]  
493 It should also be noted that in this study, a one-time 100  $\mu$ L treatment was applied locally.  
494 Clinically, osteomyelitis is treated via debridement and systemic antibiotics for several  
495 weeks.[33] Similarly, success with bacteriophage therapy has been associated with continuous,  
496 prolonged delivery of the virus. A bacteriophage cocktail was used to successfully clear femoral  
497 infection with four intraperitoneal doses of phage (100  $\mu$ L of  $\sim 2 \times 10^{12}$  plaque forming units  
498 (PFU)/mL) over the span of 48 hours.[38] Another study adopted a treatment regimen for tibial  
499 osteomyelitis consisting of a once daily  $3 \times 10^8$  PFU/mL intramuscular bacteriophage injection for  
500 14 days, which resolved the infection.[39] Recently, a case report was published describing the  
501 success of a weekly injection of bacteriophage over a seven-week period for human digital  
502 osteomyelitis.[36] Collectively, these data suggest that sustained, localized concentrations of  
503 phage may be necessary for efficacy in treatment of bone infection. In future studies, a greater  
504 initial dose of phage therapeutic should be considered, or a longer duration of treatment achieved  
505 with a delivery vehicle capable of tailored release of therapeutic. Given a higher phage dose  
506 and/or prolonged availability, it is possible that the efficacy of phage observed here *in vitro* could  
507 be matched *in vivo*. Furthermore, it may be more advantageous to use alternating doses of the  
508 antibiotic and phage therapeutic over time, rather than a combined simultaneous  
509 application.[40,41] In this study, no additive effect of fosfomycin or phage was observed in the  
510 dual treatment group. Only a 24h treatment period was evaluated, which may have limited the  
511 effect of our selected therapeutics, as later time points may have allowed therapeutics, especially  
512 those containing phages (which must replicate for optimal bactericidal activity), to have a

513 cumulative effect. Nonetheless, our challenging composite tissue infection model enabled  
514 efficient, rapid testing of antimicrobial therapeutics using a biofilm forming strain of *S. aureus*.  
515 Despite the prevalence and severity of osteomyelitis, no bacteriophage-based treatment  
516 for the disease has reached clinical trials in the United States. As populations of MDR-bacteria  
517 continue to spread and new strains are isolated, engineering novel therapeutics will be essential  
518 to augment the dwindling list of effective, available antibiotics. Phage therapy has great potential  
519 to fill this niche, as phages can be made readily and at a low cost. Using CRISPR-Cas9  
520 technology as in this study, phages can be modified to have a wide host range.[21] By  
521 contributing to the pipeline of bacteriophage therapeutic evaluation compared to traditional  
522 antibiotics, the goal of this work was to demonstrate efficacy of phage against bone and soft  
523 tissue infection. Enhanced bactericidal activity of CRISPR-Cas9 phage was demonstrated *in*  
524 *vitro* against biofilm, when compared to conventionally used vancomycin and fosfomycin  
525 antibiotics. Subsequently, an implant-related model of osteomyelitis and soft tissue infection was  
526 established, confirmed with histological, radiographic, and scanning electron microscopy  
527 analyses. Although phage did not mitigate bone infection 24h post-treatment, soft tissue infection  
528 was reduced 24h following treatment with bacteriophage, and notably to the same extent as  
529 treatment with high dose antibiotic. To improve bacteriological outcomes in the future, further  
530 investigations of delivery vehicles and optimal dosing are warranted.

## 531 **Acknowledgements**

532 This research was supported by the xxxxxxxx and the xxxxxxx. The authors would like to thank  
533 Dr. Jean Feugang and the USDA-ARS Biophotonics Initiative (58-6402-3-018) for supporting  
534 our use of the IVIS Lumina XR system, Dr. Alicia Olivier for histological analyses, and Drs.  
535 Lucy Senter and Bridget Willeford for veterinary care. Thanks also to Jamie Walker, Delisa

536 Pennell, Dr. Hayley Gallaher, Weitong Chen, Kali Sebastian, Kristen Lacy, Christine Grant,  
537 Drew Moran, Ryan Yingling, Alex Feaster, Hannah Bostick, Christina Moffett, Sonja Jensen,  
538 Anna Marie Dulaney, and Luke Tucker for assistance with surgeries.

## 539 Citations

- 540 1. Center for Disease Control and Prevention. Antibiotic Use in the United States, 2017:  
541 Progress and Opportunities. US Dep Heal Hum Serv . 2017;  
542 doi:10.1073/pnas.1417106112
- 543 2. Thorpe KE, Joski P, Johnston KJ. Antibiotic-Resistant Infection Treatment Costs Have  
544 Doubled Since 2002, Now Exceeding \$2 Billion Annually. Health Aff (Millwood). United  
545 States; 2018;37: 662–669. doi:10.1377/hlthaff.2017.1153
- 546 3. O’Neill J. Antimicrobial Resistance : Tackling a crisis for the health and wealth of nations.  
547 Rev Antimicrob Resist. 2014;
- 548 4. Tom Frieden. Antibiotic Resistance Threats. Cdc. 2013; doi:CS239559-B
- 549 5. Archer NK, Mazaitis MJ, William Costerton J, Leid JG, Powers ME, Shirtliff ME.  
550 Staphylococcus aureus biofilms: Properties, regulation and roles in human disease.  
551 Virulence. 2011. doi:10.4161/viru.2.5.17724
- 552 6. Johnson CT, Wroe JA, Agarwal R, Martin KE, Guldberg RE, Donlan RM, et al. Hydrogel  
553 delivery of lysostaphin eliminates orthopedic implant infection by *Staphylococcus aureus*  
554 and supports fracture healing. Proc Natl Acad Sci. 2018; doi:10.1073/pnas.1801013115
- 555 7. Geraghty T, LaPorta G. Current health and economic burden of chronic diabetic  
556 osteomyelitis. Expert Review of Pharmacoeconomics and Outcomes Research. 2019.  
557 doi:10.1080/14737167.2019.1567337
- 558 8. Rowley WR, Bezold C, Arikan Y, Byrne E, Krohe S. Diabetes 2030: Insights from



- 559 Yesterday, Today, and Future Trends. *Popul Health Manag.* 2017;  
560 doi:10.1089/pop.2015.0181
- 561 9. Abatangelo V, Peressutti Bacci N, Boncompain CA, Amadio AA, Carrasco S, Suárez CA,  
562 et al. Broad-range lytic bacteriophages that kill *Staphylococcus aureus* local field strains.  
563 *PLoS One.* 2017; doi:10.1371/journal.pone.0181671
- 564 10. Tang Z, Huang X, Sabour PM, Chambers JR, Wang Q. Preparation and characterization of  
565 dry powder bacteriophage K for intestinal delivery through oral administration. *LWT -*  
566 *Food Sci Technol.* 2015; doi:10.1016/j.lwt.2014.08.012
- 567 11. Furfaro LL, Payne MS, Chang BJ. Bacteriophage Therapy: Clinical Trials and Regulatory  
568 Hurdles. *Front Cell Infect Microbiol.* 2018; doi:10.3389/fcimb.2018.00376
- 569 12. Wright A, Hawkins CH, Änggård EE, Harper DR. A controlled clinical trial of a  
570 therapeutic bacteriophage preparation in chronic otitis due to antibiotic-resistant  
571 *Pseudomonas aeruginosa*; a preliminary report of efficacy. *Clin Otolaryngol.*  
572 *Wiley/Blackwell* (10.1111); 2009;34: 349–357. doi:10.1111/j.1749-4486.2009.01973.x
- 573 13. Leitner L, Sybesma W, Chanishvili N, Goderdzishvili M, Chkhotua A, Ujmajuridze A, et  
574 al. Bacteriophages for treating urinary tract infections in patients undergoing transurethral  
575 resection of the prostate: A randomized, placebo-controlled, double-blind clinical trial.  
576 *BMC Urol.* 2017; doi:10.1186/s12894-017-0283-6
- 577 14. Fabijan AP, Lin RCY, Ho J, Maddocks S, Iredell JR. Safety and Tolerability of  
578 Bacteriophage Therapy in Severe <em>&lt;/em>*Staphylococcus aureus*</em>.  
579 *Infection.* bioRxiv. 2019; 619999. doi:10.1101/619999
- 580 15. Voelker R. FDA Approves Bacteriophage TrialFDA Approves Bacteriophage TrialNews  
581 From the Food and Drug Administration. *JAMA.* 2019;321: 638.

- 582           doi:10.1001/jama.2019.0510
- 583   16.   Johnson C, Dinjaski N, Prieto M, García A. Bacteriophage Encapsulation in  
584   Poly(Ethylene Glycol) Hydrogels Significantly Reduces Bacteria Numbers in an Implant-  
585   Associated Infection Model of Bone Repair. *Igarss* 2014. 2014; doi:10.1007/s13398-014-  
586   0173-7.2
- 587   17.   Bean JE, Alves DR, Laabei M, Esteban PP, Thet NT, Enright MC, et al. Triggered  
588   Release of Bacteriophage K from Agarose/Hyaluronan Hydrogel Matrixes by  
589   Staphylococcus aureus Virulence Factors [Internet]. *CHEMISTRY OF MATERIALS*. pp.  
590   7201–7208. doi:10.1021/cm503974g
- 591   18.   Priddy LB, Chaudhuri O, Stevens HY, Krishnan L, Uhrig BA, Willett NJ, et al. Oxidized  
592   alginate hydrogels for bone morphogenetic protein-2 delivery in long bone defects. *Acta*  
593   *Biomater*. 2014/06/17. 2014;10: 4390–4399. doi:10.1016/j.actbio.2014.06.015
- 594   19.   Krishnan L, Priddy LB, Esancy C, Li MTA, Stevens HY, Jiang X, et al. Hydrogel-based  
595   Delivery of rhBMP-2 Improves Healing of Large Bone Defects Compared With  
596   Autograft. *Clin Orthop Relat Res*. 2015; doi:10.1007/s11999-015-4312-z
- 597   20.   Souza GR, Yonel-Gumruk E, Fan D, Easley J, Rangel R, Guzman-Rojas L, et al. Bottom-  
598   up assembly of hydrogels from bacteriophage and Au nanoparticles: The effect of Cis-  
599   and trans-acting factors. *PLoS One*. 2008; doi:10.1371/journal.pone.0002242
- 600   21.   Park JY, Moon BY, Park JW, Thornton JA, Park YH, Seo KS. Genetic engineering of a  
601   temperate phage-based delivery system for CRISPR/Cas9 antimicrobials against  
602   Staphylococcus aureus. *Sci Rep*. The Author(s); 2017;7: 44929. Available:  
603   <http://dx.doi.org/10.1038/srep44929>
- 604   22.   De Jong NWM, Van Der Horst T, Van Strijp JAG, Nijland R. Fluorescent reporters for

- 605 markerless genomic integration in *Staphylococcus aureus*. *Sci Rep*. 2017;  
606 doi:10.1038/srep43889
- 607 23. Bauer AW, Kirby WM, Sherris JC, Turck M. Antibiotic susceptibility testing by a  
608 standardized single disk method. *Am J Clin Pathol*. England; 1966;45: 493–496.
- 609 24. Karnovsky MJ. A Formaldehyde-Glutaraldehyde Fixative of High Osmolality for Use in  
610 Electron Microscopy. The American Society for Cell Biology Source: The Journal of Cell  
611 Biology. 1965.
- 612 25. Kristensen HK. An Improved Method of Decalcification. *Stain Technol*. Taylor &  
613 Francis; 1948;23: 151–154. doi:10.3109/10520294809106242
- 614 26. Dijkmans AC, Zacarías NVO, Burggraaf J, Mouton JW, Wilms E, van Nieuwkoop C, et  
615 al. Fosfomycin: Pharmacological, Clinical and Future Perspectives. *Antibiotics*. 2017;  
616 doi:10.3390/antibiotics6040024
- 617 27. Krishnan L, Priddy LB, Esancy C, Klosterhoff BS, Stevens HY, Tran L, et al. Delivery  
618 vehicle effects on bone regeneration and heterotopic ossification induced by high dose  
619 BMP-2. *Acta Biomater*. 2017; doi:10.1016/j.actbio.2016.12.012
- 620 28. Lodise TP, Lomaestro B, Graves J, Drusano GL. Larger vancomycin doses (at least four  
621 grams per day) are associated with an increased incidence of nephrotoxicity. *Antimicrob*  
622 *Agents Chemother*. 2008; doi:10.1128/AAC.01602-07
- 623 29. Wang F, Zhou H, Olademehin OP, Kim SJ, Tao P. Insights into key interactions between  
624 vancomycin and bacterial cell wall structures. *ACS Omega*. 2018;  
625 doi:10.1021/acsomega.7b01483
- 626 30. Takahata S, Ida T, Hiraishi T, Sakakibara S, Maebashi K, Terada S, et al. Molecular  
627 mechanisms of fosfomycin resistance in clinical isolates of *Escherichia coli*. *Int J*

- 628 Antimicrob Agents. 2010; doi:10.1016/j.ijantimicag.2009.11.011
- 629 31. Alves DR, Gaudion A, Bean JE, Perez Esteban P, Arnot TC, Harper DR, et al. Combined  
630 Use of Bacteriophage K and a Novel Bacteriophage To Reduce Staphylococcus aureus  
631 Biofilm Formation. *Appl Environ Microbiol.* 2014; doi:10.1128/aem.01789-14
- 632 32. Pincus NB, Reckhow JD, Saleem D, Jammeh ML, Datta SK, Myles IA. Strain specific  
633 phage treatment for Staphylococcus aureus infection is influenced by host immunity and  
634 site of infection. *PLoS One.* 2015; doi:10.1371/journal.pone.0124280
- 635 33. Nelson CL, McLaren SG, Skinner RA, Smeltzer MS, Thomas JR, Olsen KM. The  
636 treatment of experimental osteomyelitis by surgical debridement and the implantation of  
637 calcium sulfate tobramycin pellets. *J Orthop Res.* 2002; doi:10.1016/S0736-  
638 0266(01)00133-4
- 639 34. Taki H, Krkovic M, Moore E, Abood A, Norrish A. Chronic long bone osteomyelitis:  
640 diagnosis, management and current trends. *Br J Hosp Med.* 2016;  
641 doi:10.12968/hmed.2016.77.10.c161
- 642 35. Berbari EF, Kanj SS, Kowalski TJ, Darouiche RO, Widmer AF, Schmitt SK, et al. 2015  
643 Infectious Diseases Society of America (IDSA) Clinical Practice Guidelines for the  
644 Diagnosis and Treatment of Native Vertebral Osteomyelitis in Adults<sup>a</sup>. *Clinical Infectious*  
645 *Diseases.* 2015. doi:10.1093/cid/civ633
- 646 36. Fish R, Kutter E, Bryan D, Wheat G, Kuhl S. Resolving Digital Staphylococcal  
647 Osteomyelitis Using Bacteriophage—A Case Report. *Antibiotics.* 2018;  
648 doi:10.3390/antibiotics7040087
- 649 37. de Mesy Bentley KL, Trombetta R, Nishitani K, Bello-Irizarry SN, Ninomiya M, Zhang  
650 L, et al. Evidence of Staphylococcus Aureus Deformation, Proliferation, and Migration in

- 651           Canaliculi of Live Cortical Bone in Murine Models of Osteomyelitis. *J Bone Miner Res.*  
652           2017; doi:10.1002/jbmr.3055
- 653   38.   Kishor C, Mishra RR, Saraf SK, Kumar M, Srivastav AK, Nath G. Phage therapy of  
654           staphylococcal chronic osteomyelitis in experimental animal model. *Indian J Med Res.*  
655           2016; doi:10.4103/0971-5916.178615
- 656   39.   Ibrahim OMS, Sarhan SR, Salih SI. Activity of Isolated Staphylococcal Bacteriophage in  
657           Treatment of Experimentally Induced Chronic Osteomyelitis in Rabbits. *Adv Anim Vet*  
658           *Sci.* 2016; doi:10.14737/journal.aavs/2016/4.11.593.603
- 659   40.   Lopes A, Pereira C, Almeida A. Sequential Combined Effect of Phages and Antibiotics on  
660           the Inactivation of *Escherichia coli*. *Microorganisms.* MDPI; 2018;6: 125.  
661           doi:10.3390/microorganisms6040125
- 662   41.   Tagliaferri TL, Jansen M, Horz H-P. Fighting Pathogenic Bacteria on Two Fronts: Phages  
663           and Antibiotics as Combined Strategy [Internet]. *Frontiers in Cellular and Infection*  
664           *Microbiology* . 2019. p. 22. Available:  
665           <https://www.frontiersin.org/article/10.3389/fcimb.2019.00022>  
666

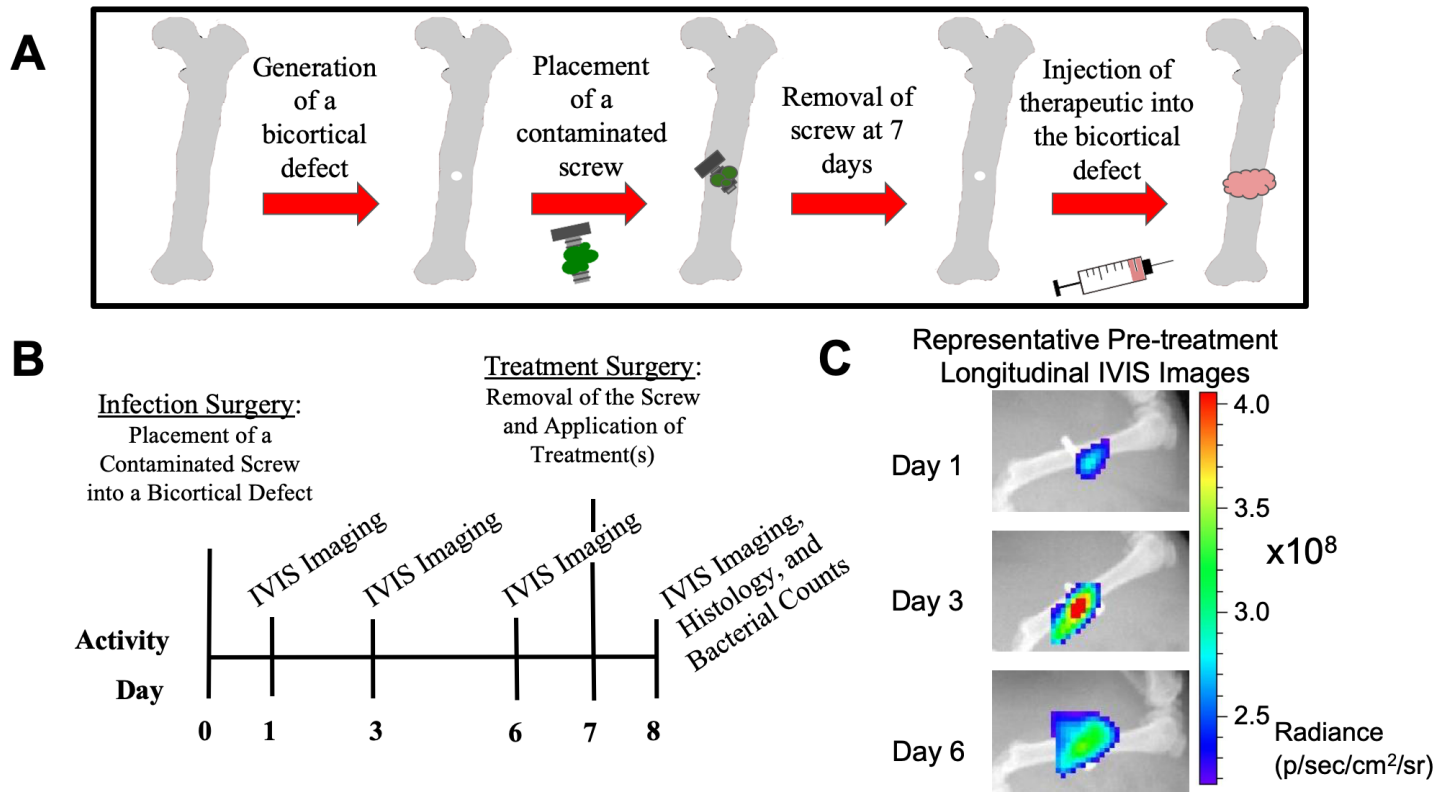

**A** *in vitro* stability of ATCC 6538-GFP **B** *ex vivo* stability of ATCC 6538-GFP

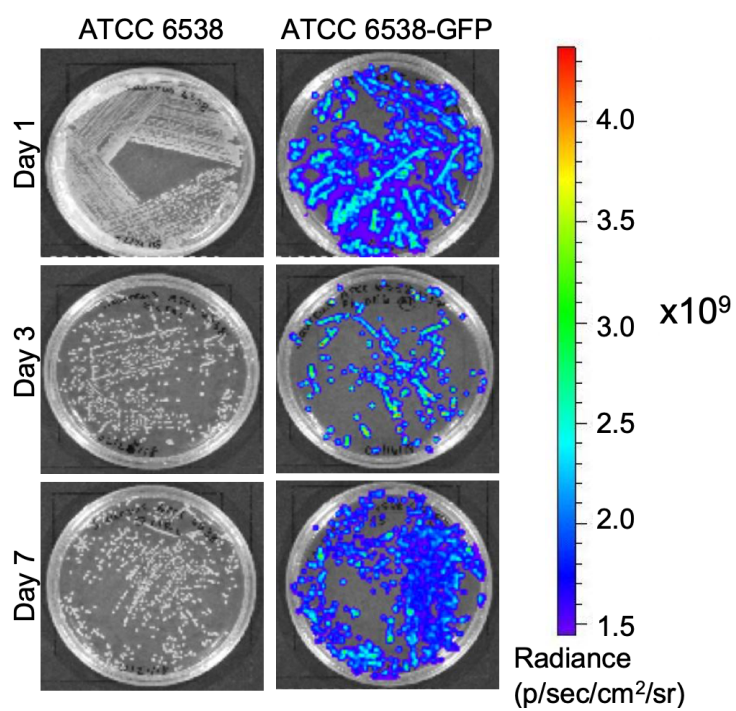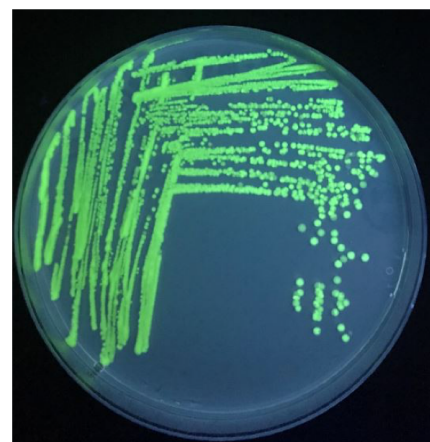

### A Kirby-Bauer Assay

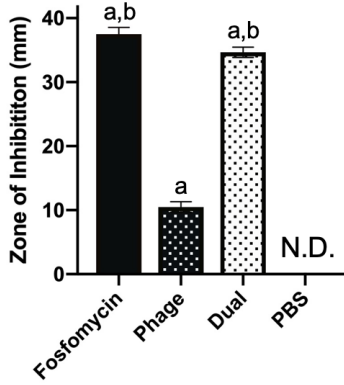

### B Qualitative Antibiofilm Assay

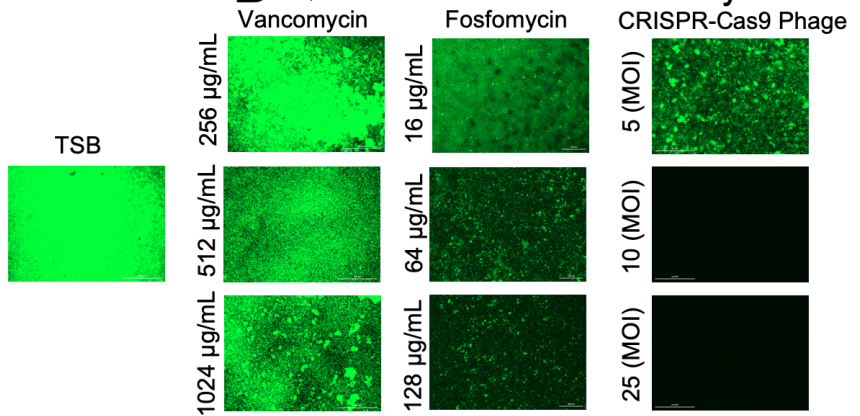

### C Quantitative Antibiofilm Assay

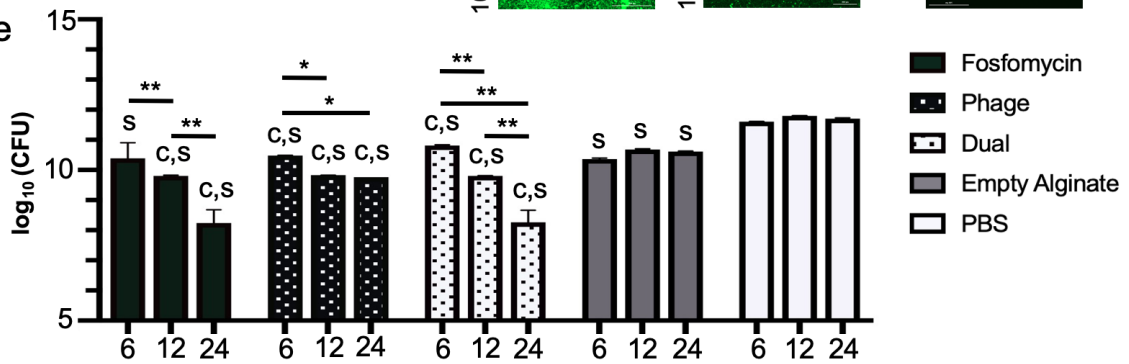



**A** Effect of Soak Time on Screw Bacterial Load

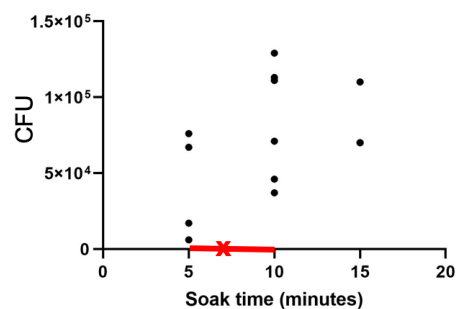

**B** Effect of Dry Time on Screw Bacterial Load

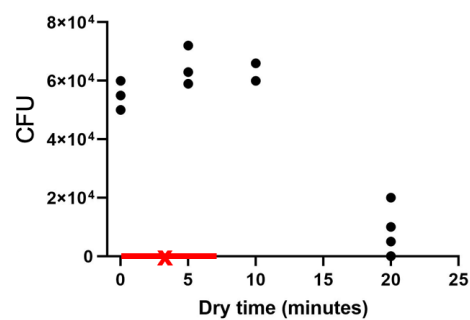

**C** Bacteria Recovered from *ex vivo* Orthopedic Screws at Day 7

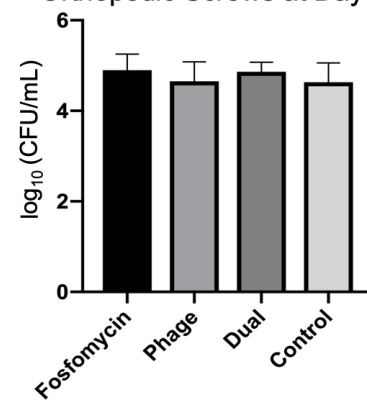

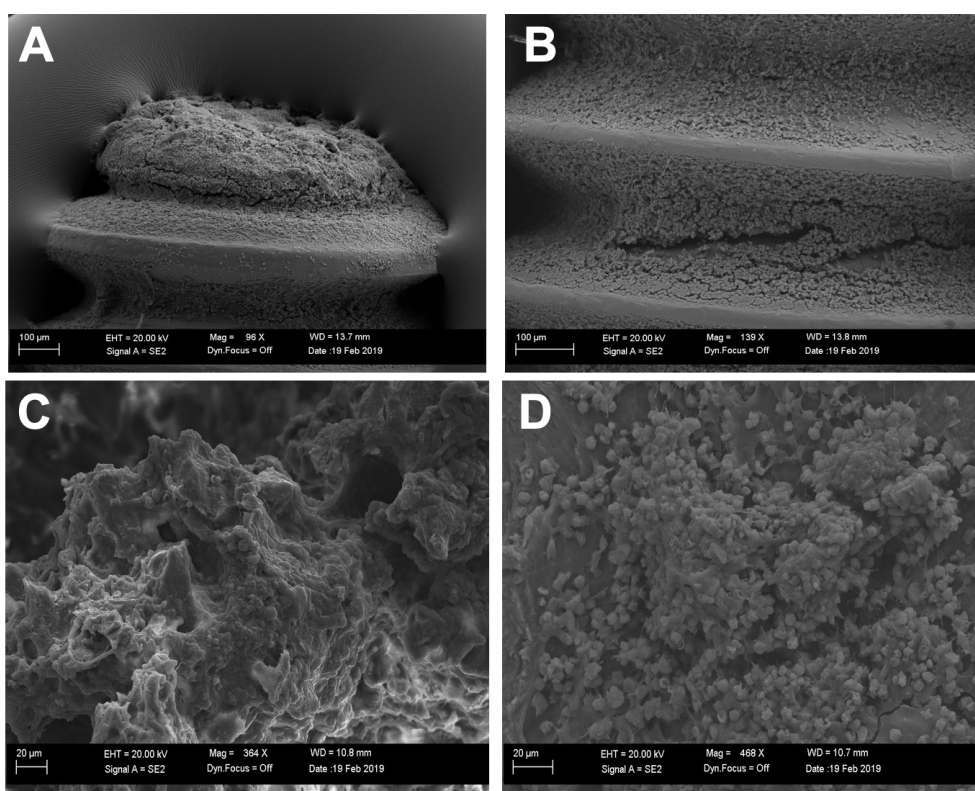

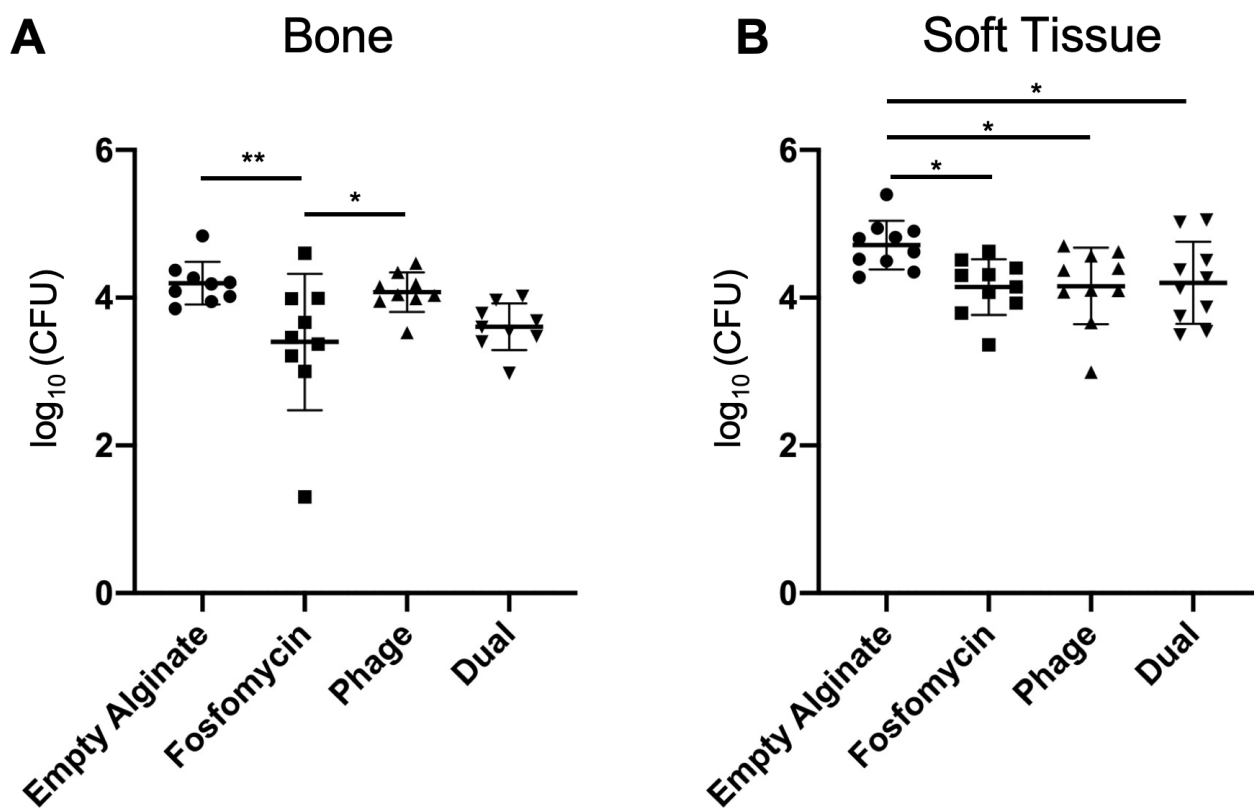

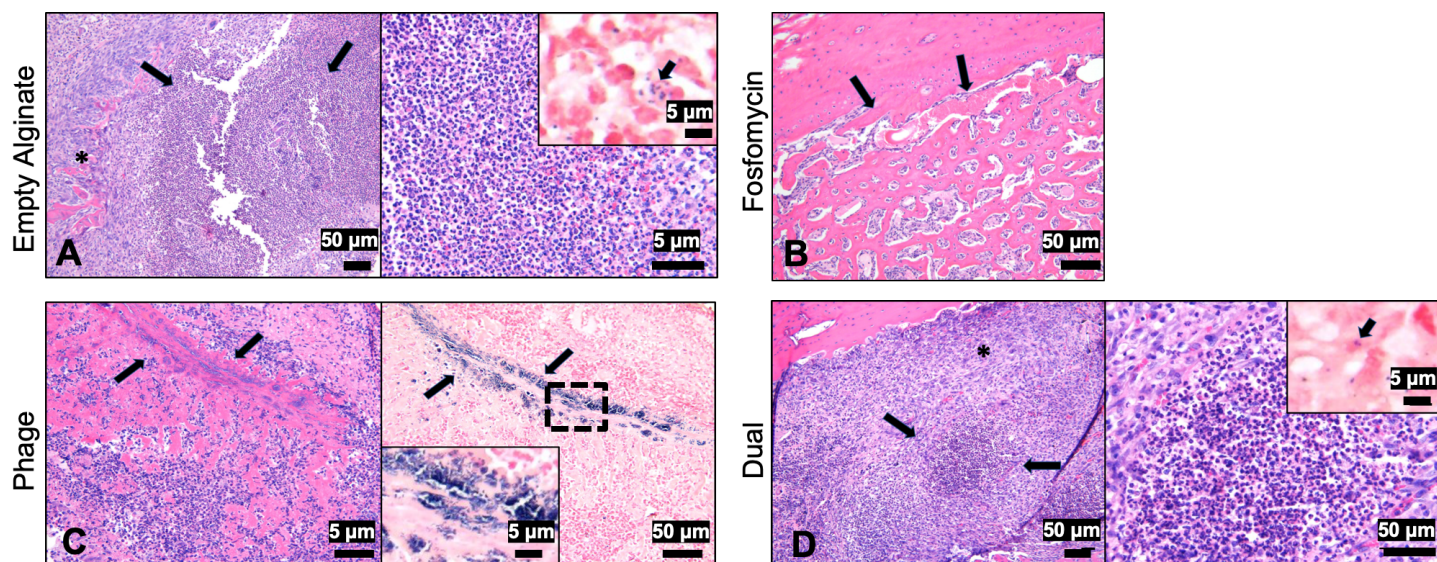

Source: https://www.biorxiv.org/content/10.1101/705830v1.full.pdf
